# Supplementary material
Source: PubMed Central journal article supplement (PMC1570174)
Supplement: bj3990047add.pdf [file bj3990047add.pdf]

## SUPPLEMENTARY INFORMATION

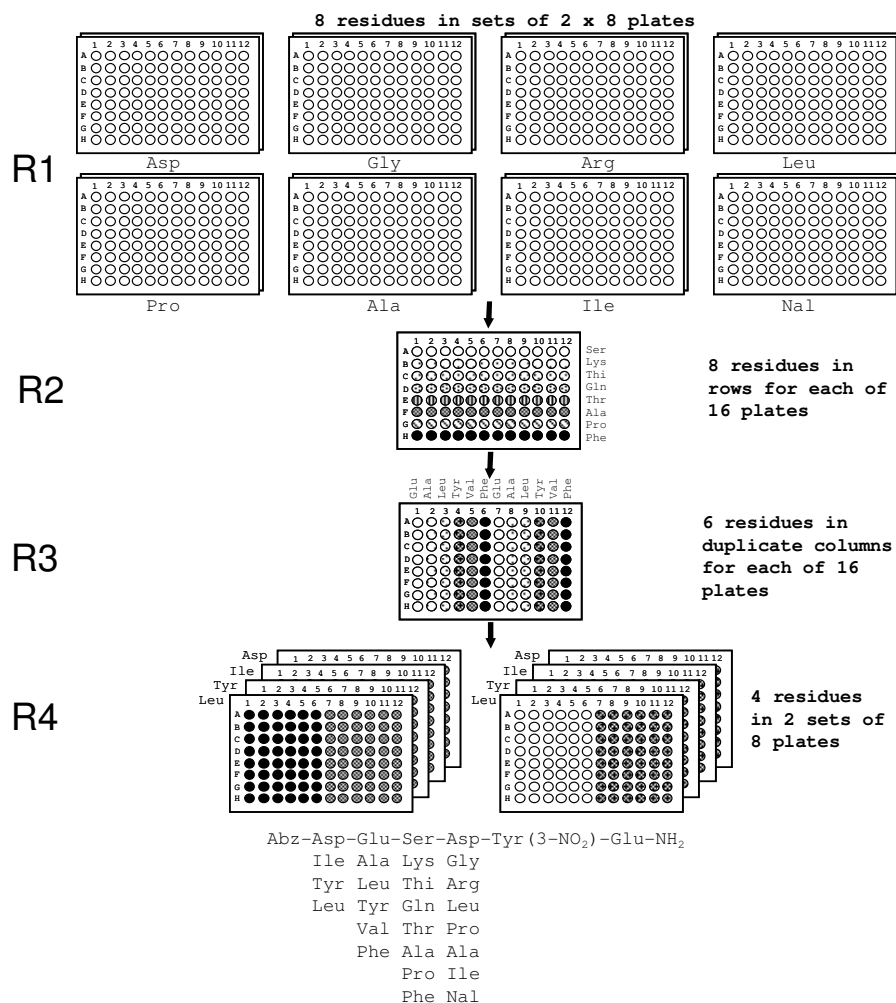

### Supplementary Figure 1 Synthesis of the spatially addressed of 1536-membered FRET substrate library

Gears were subjected to four rounds of divergent combinatorial expansion to yield a 1536 member library distributed in sixteen 96-well microtitre plates. Synthesis was based on the 96-well microtiter plate format, the first round was composed of sixteen lots of ninety six gears elaborated by two sets with eight residues which corresponded to R1 (*i.e.* Asp, Gly, Arg, Leu, Pro, Ala, Ile and Nal). The next round of synthesis expanded the synthesis by eight residues arranged along each row of each plate and corresponded to R2 (*i.e.* Ser, Lys, Thi, Gln, Thr, Ala, Pro and Phe). The third round of synthesis expanded the synthesis by six residues arranged in two sets (columns 1-6 and 7-12) down each column of each plate and corresponding to R3 (*i.e.* Glu, Ala, Leu, Tyr, Val and Phe). The fourth round of synthesis was based on four residues corresponding to R4 (*i.e.* Asp, Ile, Tyr and Leu). The final library synthesis step involved capping with Boc-2-Abz-OH (Neosystems) to yield a library of a general sequence, after cleavage and de-protection, of Abz-R<sub>4</sub><sub>1-4</sub>-R<sub>3</sub><sub>1-6</sub>-R<sub>2</sub><sub>1-8</sub>-R<sub>1</sub><sub>1-8</sub>-Tyr(3-NO<sub>2</sub>)-Glu-NH<sub>2</sub>.

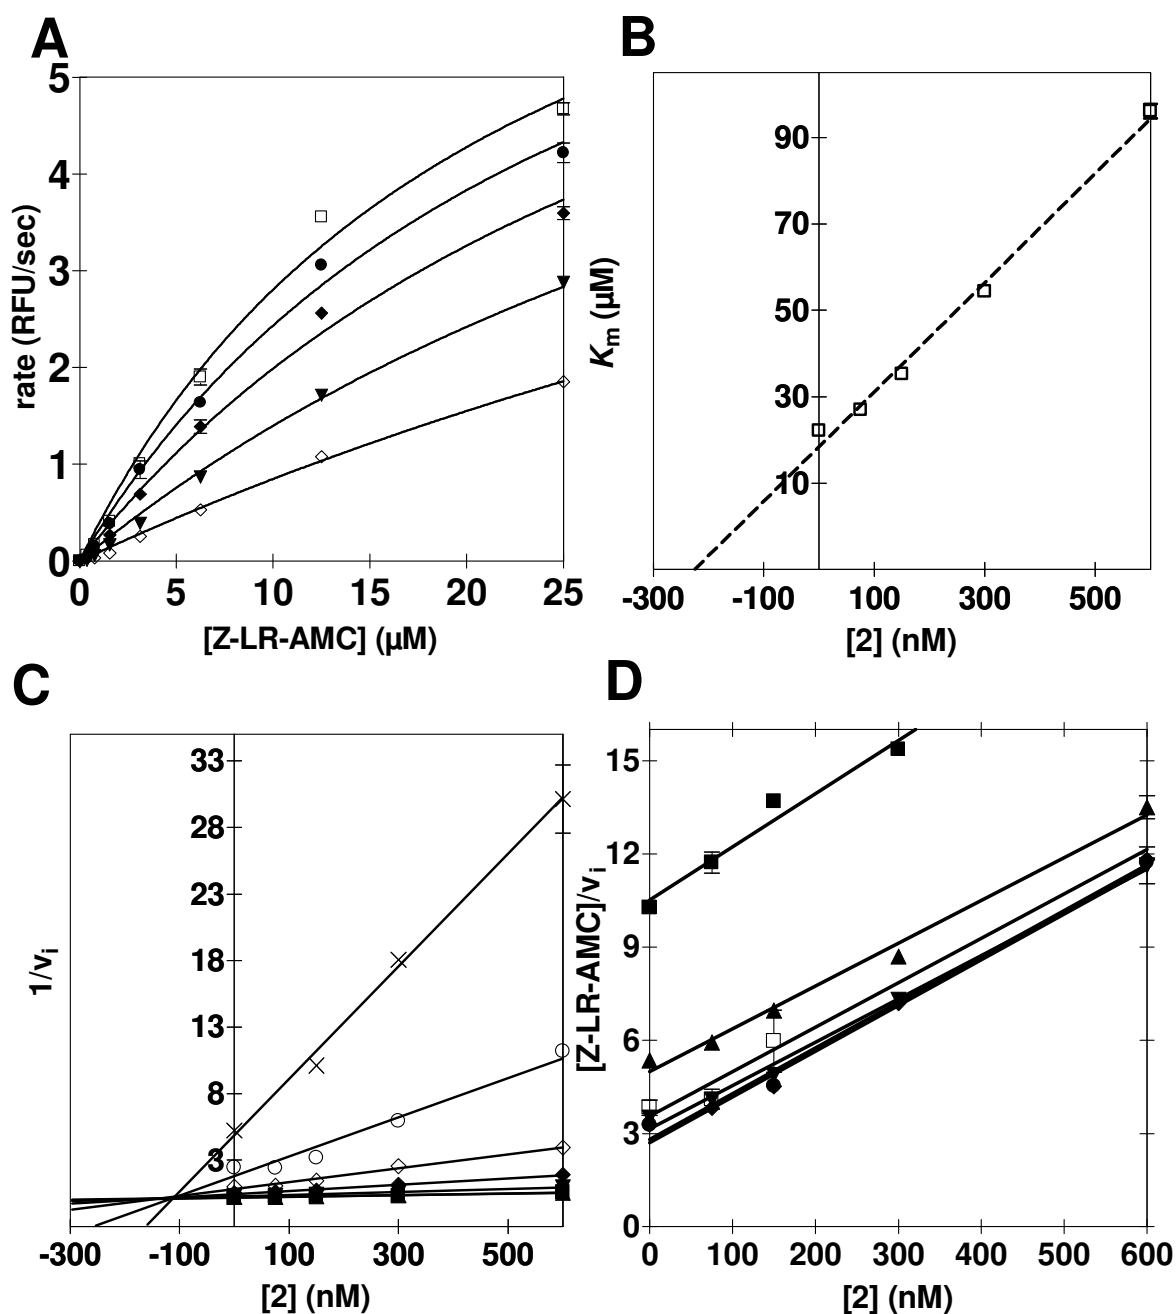

**Supplementary Figure 2 Demonstration of competitive inhibition of FP-2 by compound 2**

**A:** a plot of the dependence of Z-LR-AMC turnover by FP-2 in the presence of various concentrations of compound 2, the solid lines represent the non-linear regression analysis of the data using the equation  $v_i = (V_{max} \cdot [S_0]) / ([S_0] + (K_m))$  (see EXPERIMENTAL; [30]). **B:** a plot of the  $K_m$  values, determined at various inhibitor concentrations, versus compound 2 concentrations. The dotted line represents a linear regression analysis of the data. **C:** a plot of the reciprocal of the initial velocity ( $v_i$ ) versus compound 2 concentration at various substrate concentrations [30]. **D:** a plot of the substrate concentration divided by initial velocity ( $v_i$ ) versus compound 2 concentration at various substrate concentrations [30].

|      | Relative activity                                                      | Synthesis round                                                                                                                          |                                                                                                              |                                                                                                                                                                                                                                                                        |                                                                                                                                    |
|------|------------------------------------------------------------------------|------------------------------------------------------------------------------------------------------------------------------------------|--------------------------------------------------------------------------------------------------------------|------------------------------------------------------------------------------------------------------------------------------------------------------------------------------------------------------------------------------------------------------------------------|------------------------------------------------------------------------------------------------------------------------------------|
|      |                                                                        | R4                                                                                                                                       | R3                                                                                                           | R2                                                                                                                                                                                                                                                                     | R1                                                                                                                                 |
| All  | -<br>-                                                                 | Xaa<br>Asp/Ile                                                                                                                           | Xaa<br>Xaa                                                                                                   | Pro<br>Xaa                                                                                                                                                                                                                                                             | Xaa<br>Asp/Pro                                                                                                                     |
| FP-2 | +++++<br>++<br>-<br>++++<br>-<br>+++<br>-<br>-<br>+++<br>-<br>+++<br>- | <b>Leu</b><br>Tyr<br>Leu/Tyr<br>Ile<br>Xaa<br><b>Leu/Tyr</b><br>Leu/Tyr<br>Asp<br><b>Leu/Tyr</b><br>Leu/Tyr<br><b>Leu/Tyr</b><br>Leu/Tyr | <b>Glu</b><br>Glu<br>Val<br>Leu<br>Val<br><b>Glu</b><br>Val<br><b>Glu</b><br>Val<br><b>Glu</b><br>Val        | <b>Thi/Thr/Ala/Phe</b><br>Thi/Thr/Ala/Phe<br>Thi/Thr/Ala/Phe<br>Lys<br>Lys<br>Ser/Lys/ <b>Thi</b> /Ala/Phe<br>Ser/Lys/Thi/Ala/Phe<br>Ser/Lys/Thi/Ala/Phe<br>Ser/ <b>Lys</b> /Thi/Ala/Phe<br>Ser/Lys/Thi/Ala/Phe<br>Ser/ <b>Lys</b> /Gln/Thr/Ala<br>Ser/Lys/Gln/Thr/Ala | <b>Pro</b><br>Pro<br>Pro<br>Gly<br>Xaa<br><b>Gly/Ala</b><br>Gly/Ala<br>Gly/Ala<br>Arg/Ile<br>Arg/Ile<br>Leu/ <b>Nal</b><br>Leu/Nal |
| FP-3 | ++++<br>-<br>-<br>++<br>-<br>-<br>-<br>++++<br>-                       | <b>Leu/Tyr</b><br>Leu/Tyr<br>Leu/Tyr<br>Leu/Tyr<br>Leu/Tyr<br>Leu/Tyr<br>Asp/ <b>Ile</b> /Tyr/ <b>Leu</b><br>Asp/Ile/Tyr/Leu             | Leu/ <b>Tyr</b><br>Leu/Tyr<br>Glu/Ala/Val<br>Leu/Tyr<br>Leu/Tyr<br>Glu/Ala/Val<br>Leu/ <b>Tyr</b><br>Leu/Tyr | <b>Lys/(Thi, Thr)</b><br>Lys<br>Lys<br>Lys/Gln<br>Lys<br>Lys<br><b>Lys</b> /(Thr)<br>Lys/(Thr)                                                                                                                                                                         | <b>Ala</b> /Gly<br>Asp/Pro<br>Ala/Gly<br>Arg<br>Ile<br>Arg<br><b>Leu</b><br>Nal                                                    |
| BP-2 | ++++<br>-<br>+++++<br>-<br>++<br>+++<br>-<br>+++                       | <b>Asp/Ile/Tyr/Leu</b><br>Asp/Ile/Tyr/Leu<br><b>Ile</b><br>Asp/Tyr/Leu<br>Ile<br>Leu<br>Leu<br>Ile                                       | Leu/ <b>Val</b><br>Leu/Val<br>Leu/( <b>Val</b> )<br>Leu/(Val)<br>Leu<br>Leu<br>Leu<br>Leu                    | <b>Thi/Thr</b><br>Thi/Thr<br><b>Lys</b><br>Lys<br>Lys/Gln/Ala<br>Thi<br>Thi<br>Lys                                                                                                                                                                                     | <b>Gly</b><br>Asp/Pro/Ile/Nal<br>Ala<br>Ala<br>Arg<br>Arg<br>Ile<br>Leu                                                            |

### Supplementary Table 1 Global assessment of the general FRET substrate preferences of FP-2, FP-3 and BP-2

The relative peptide cleavage activity was expressed in arbitrary terms on a sliding scale ranging from no activity (-) to varying degrees of increasing activity (+) based on the rates observed in the FRET substrate screen. Xaa equated to a general tolerance for more than one residue represented in the library (Supplementary Figure 1). Residue combinations producing selective substrates for FP-2 (bold), FP-3 (white on black background) and BP-2 (bold underlined) have been highlighted. R1, R2, R3 and R4 denote the four rounds of split-and-mix library synthesis (Supplementary Figure 1).
